# Supplementary material for: Functional analysis of the GbDWARF14 gene associated with branching development in cotton
Source: PeerJ. 2019 May 14;7:e6901. doi: 10.7717/peerj.6901 (PMC6524629; doi:10.7717/peerj.6901)
Supplement: Supplemental Information 6 [file peerj-07-6901-s006.xlsx]

## Sheet: Sheet1
ACTIN2-F	TTCCTCATGCCATCCTCCGTCTT
ACTIN2-R	CAGCGATACCTGAGAACATAGTGG
GbD14-F	ATGGCAAACACCCTTTTAGAAGCT
GbD14-R	ACATCGGCCCCCACCAACACTGG
